# Supplementary material for: Proteasome subunit expression analysis and chemosensitivity in relapsed paediatric acute leukaemia patients receiving bortezomib-containing chemotherapy
Source: Springer Nature journal article supplement (doi:10.1186/s13045-016-0312-z), 2016-09-06
Supplement: MOESM1 [file 10655640]

## Supporting Information

Figure S1

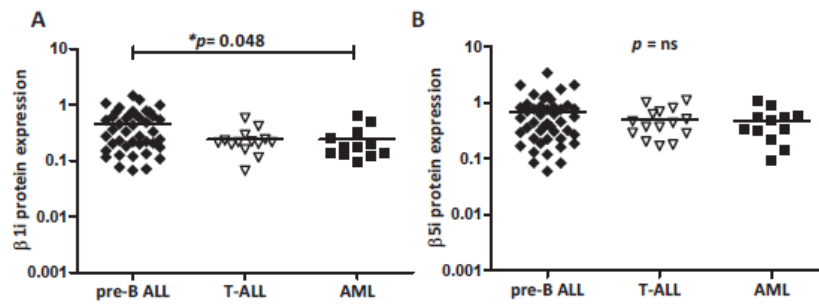

**Figure S1. Individual immunoproteasome subunit protein expression in relapsed childhood acute leukaemia patients.** Comparison of (A) immunoproteasome subunit  $\beta 1i$ , and (B) immunoproteasome subunit  $\beta 5i$ , between pre-B ALL, T-ALL and AML patients. Protein expression was assessed by Western blotting and expressed as relative quantifications of subunit expression (ratio proteasome subunit/ $\beta$ -actin based on loading of 15  $\mu$ g total protein, normalized to CEM). The closed symbols represent ALL patients, the open symbols AML patients. The line denotes the mean.

Figure S2.

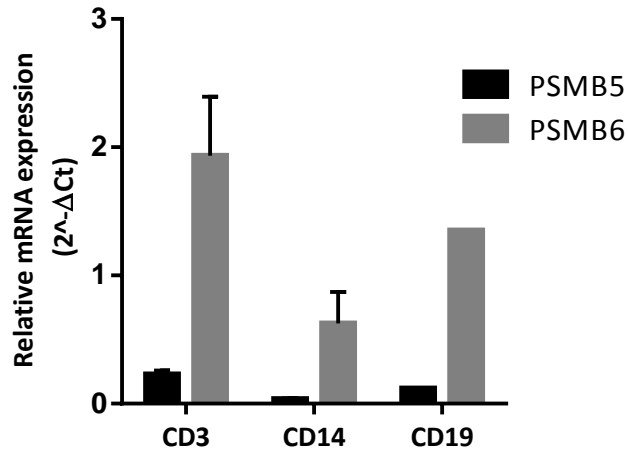

**Figure S2. Proteasome subunit mRNA expression in NBM cells.** Expression of *PSMB5* and *PSMB6* in sorted CD3 (T-cells), CD14 (monocytes), and CD19 (B-cells) from 2 healthy individuals determined by qRT-PCR normalized on expression of GUS housekeeping gene.

**Figure S3 eventueel? AANPASSEN MET NIEUWE SAMPLES**

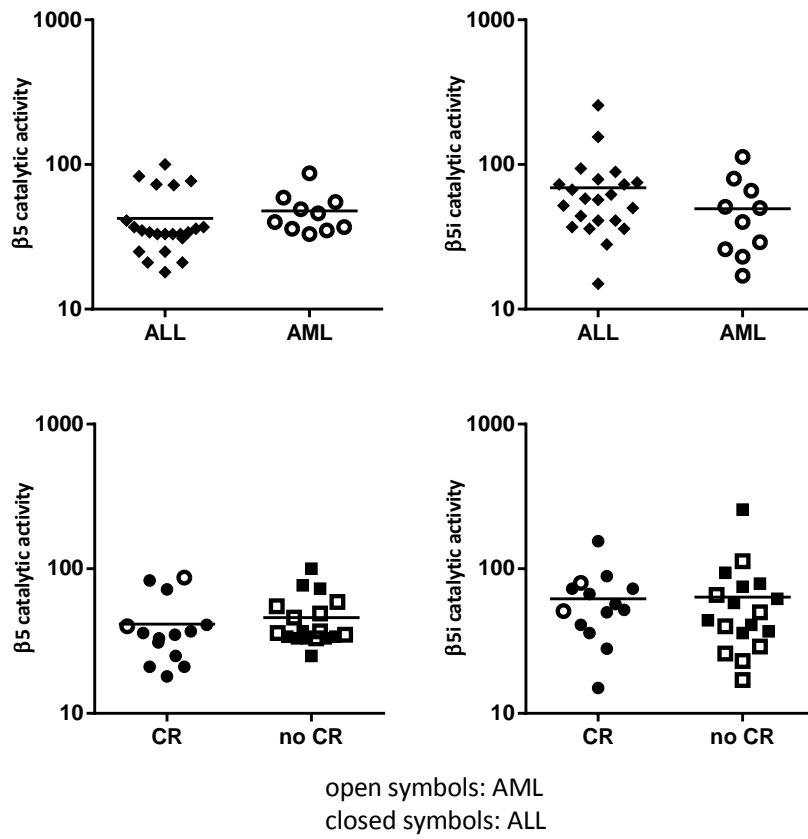

**Figure S3. Proteasome subunit catalytic activity in relapsed childhood ALL and AML patients.** Comparison of catalytic activity of constitutive subunit  $\beta 5$  and immunoproteasome subunit  $\beta 5i$  between ALL and AML patients. The line denotes the mean for ALL (n=22) and AML (n=10).
